# Supplementary material for: Neurofilament-Light Chain as Biomarker of Neurodegenerative and Rare Diseases With High Translational Value
Source: Front Neurosci. 2020 Jun 11;14:579. doi: 10.3389/fnins.2020.00579 (PMC7300175; doi:10.3389/fnins.2020.00579)
Supplement: TABLE S1 — Raw data of Figures 1, 2. [file Table_1.XLSX]

## Sheet: Figure 1
Figure 1A
	ntg								Line 61
3	39.6	3501,5*							92.7	111.8	160.6	58.8
6	67.2	265							118.2	69.4	267.1	699.1
9	67.2	233							162.8	111.8	250.1	363.4
12	111.8	154.3							1891	235.1	160.6	696.9
Figure 1B
Age in months	ntg								5xFAD
3	18.2	198.9	703.6	55.5					290.5	328.2	128.6	252.1	222	180.6	224.5	69.5
6	723.2	318.2	110.3	41.5					627.5	919	921.4	1009.6	870	590.7	487.3	679
9	74.9	141.7	850.4	2015,9*					769.7	1147	634.9	936.1	1208.5	710.9	889.6	1230.7
12	205.3	126.6	156.4	280					1356.5	1587.6	3523,7*	1366.4	983.5	1748.3	1907.5	1632.2
Figure 1C
	ntg								TAR6/6
9	15.678	0	<LLOQ	141.43	<LLOQ	22.046			401.31	374.046	496.108	360.704	430.514	565.2
17	29.96	102.206	5.338	80.724	65.656	<LLOQ			350.35	605.428	93.974	282.89	177.018	747.8
25	45.058	17.832	54.628	18.394	69.228	<LLOQ			262.984	302.226	212.616	291.392	231.512	301.078
Figure 1D
	ntg								SOD1-G93A
24	89.3	568.47	1328.25	<LLOQ	190.04	259.67	52.86	<LLOQ	2633.34	3202.43	2890.57		3163.24	1512.95	1565.59
27	108.61	44.3	573.81	<LLOQ	122.31	58.54	78.19	<LLOQ	6878.09	3714.48	2098.03	3941.78	4714.42	1791.44	2696.9
30	219.57	58.54	240.97	<LLOQ	64.18	111.36	114.1	111.36	3541.48	11140.4	7256.74		3767.85	5788.53	5474.61
Figure 1E
C57Bl/6	4L/PS+/+NA	4L/PS-NA
223.1	121.4	1233.1
151.7	84.5	1354.4
210.5	110.7	1309.5
255.9	96.4	956.6
385.8	129.2	2338
126.9	84.5	1659.2
147.3	176	1716.3
*excluded due to strong outlier
LLOQ = lower limit of quantification
group sizes vary due to avaiability of age matched samples

## Sheet: Figure 2
Figure 1A
ntg	5xFAD
0	19791
964.5	19159
771.795	19469.8
24.12	22388.9
	14489.4
	23898.7
Figure 1B
C57Bl/6	4L/PS+/+NA	4L/PS-NA
235.3	366	77025.7
	807.1	40265.2
492.1	933.1	52034.9
795	775.6	38002.7
1425.2	555.1	37836.6
	964.6	62977.4
	239.7	39969.7
